# Supplementary material
Source: HighWire-hosted journal article supplement (https://qualitysafety.bmj.com/content/28/4/284)
Supplement: inline-supplementary-material-1 [file inline-supplementary-material-1.pdf]

**Appendix A: The ICD-10 codes used to generate the Hospital Frailty Risk Score (HFRS)**

| <b>ICD-10 Code</b> | <b>Diagnosis</b>                                                                                    | <b>Points Awarded</b> |
|--------------------|-----------------------------------------------------------------------------------------------------|-----------------------|
| <b>F00</b>         | Dementia in Alzheimer's disease                                                                     | 7·1                   |
| <b>G81</b>         | Hemiplegia                                                                                          | 4·4                   |
| <b>G30</b>         | Alzheimer's disease                                                                                 | 4·0                   |
| <b>I69</b>         | Sequelae of cerebrovascular disease (secondary codes)                                               | 3·7                   |
| <b>R29</b>         | Other symptoms and signs involving the nervous and musculoskeletal systems (R29·6 Tendency to fall) | 3·6                   |
| <b>N39</b>         | Other disorders of urinary system (includes urinary tract infection and urinary incontinence)       | 3·2                   |
| <b>F05</b>         | Delirium, not induced by alcohol and other psychoactive substances                                  | 3·2                   |
| <b>W19</b>         | Unspecified fall                                                                                    | 3·2                   |
| <b>S00</b>         | Superficial injury of head                                                                          | 3·2                   |
| <b>R31</b>         | Unspecified haematuria                                                                              | 3·0                   |
| <b>B96</b>         | Other bacterial agents as the cause of diseases classified to other chapters (secondary code)       | 2·9                   |
| <b>R41</b>         | Other symptoms and signs involving cognitive functions and awareness                                | 2·7                   |
| <b>R26</b>         | Abnormalities of gait and mobility                                                                  | 2·6                   |
| <b>I67</b>         | Other cerebrovascular diseases                                                                      | 2·6                   |
| <b>R56</b>         | Convulsions, not elsewhere classified                                                               | 2·6                   |
| <b>R40</b>         | Somnolence, stupor and coma                                                                         | 2·5                   |
| <b>T83</b>         | Complications of genitourinary prosthetic devices, implants and grafts                              | 2·4                   |
| <b>S06</b>         | Intracranial injury                                                                                 | 2·4                   |
| <b>S42</b>         | Fracture of shoulder and upper arm                                                                  | 2·3                   |
| <b>E87</b>         | Other disorders of fluid, electrolyte and acid-base balance                                         | 2·3                   |
| <b>M25</b>         | Other joint disorders, not elsewhere classified                                                     | 2·3                   |

|            |                                                                                        |     |
|------------|----------------------------------------------------------------------------------------|-----|
| <b>E86</b> | Volume depletion                                                                       | 2·3 |
| <b>R54</b> | Senility                                                                               | 2·2 |
| <b>Z50</b> | Care involving use of rehabilitation procedures                                        | 2·1 |
| <b>F03</b> | Unspecified dementia                                                                   | 2·1 |
| <b>W18</b> | Other fall on same level                                                               | 2·1 |
| <b>Z75</b> | Problems related to medical facilities and other health care                           | 2·0 |
| <b>F01</b> | Vascular dementia                                                                      | 2·0 |
| <b>S80</b> | Superficial injury of lower leg                                                        | 2·0 |
| <b>L03</b> | Cellulitis                                                                             | 2·0 |
| <b>H54</b> | Blindness and low vision                                                               | 1·9 |
| <b>E53</b> | Deficiency of other B group vitamins                                                   | 1·9 |
| <b>Z60</b> | Problems related to social environment                                                 | 1·8 |
| <b>G20</b> | Parkinson's disease                                                                    | 1·8 |
| <b>R55</b> | Syncope and collapse                                                                   | 1·8 |
| <b>S22</b> | Fracture of rib(s), sternum and thoracic spine                                         | 1·8 |
| <b>K59</b> | Other functional intestinal disorders                                                  | 1·8 |
| <b>N17</b> | Acute renal failure                                                                    | 1·8 |
| <b>L89</b> | Decubitus ulcer                                                                        | 1·7 |
| <b>Z22</b> | Carrier of infectious disease                                                          | 1·7 |
| <b>B95</b> | Streptococcus and staphylococcus as the cause of diseases classified to other chapters | 1·7 |
| <b>L97</b> | Ulcer of lower limb, not elsewhere classified                                          | 1·6 |
| <b>R44</b> | Other symptoms and signs involving general sensations and perceptions                  | 1·6 |
| <b>K26</b> | Duodenal ulcer                                                                         | 1·6 |
| <b>I95</b> | Hypotension                                                                            | 1·6 |
| <b>N19</b> | Unspecified renal failure                                                              | 1·6 |

|            |                                                                         |     |
|------------|-------------------------------------------------------------------------|-----|
| <b>A41</b> | Other septicaemia                                                       | 1·6 |
| <b>Z87</b> | Personal history of other diseases and conditions                       | 1·5 |
| <b>J96</b> | Respiratory failure, not elsewhere classified                           | 1·5 |
| <b>X59</b> | Exposure to unspecified factor                                          | 1·5 |
| <b>M19</b> | Other arthrosis                                                         | 1·5 |
| <b>G40</b> | Epilepsy                                                                | 1·5 |
| <b>M81</b> | Osteoporosis without pathological fracture                              | 1·4 |
| <b>S72</b> | Fracture of femur                                                       | 1·4 |
| <b>S32</b> | Fracture of lumbar spine and pelvis                                     | 1·4 |
| <b>E16</b> | Other disorders of pancreatic internal secretion                        | 1·4 |
| <b>R94</b> | Abnormal results of function studies                                    | 1·4 |
| <b>N18</b> | Chronic renal failure                                                   | 1·4 |
| <b>R33</b> | Retention of urine                                                      | 1·3 |
| <b>R69</b> | Unknown and unspecified causes of morbidity                             | 1·3 |
| <b>N28</b> | Other disorders of kidney and ureter, not elsewhere classified          | 1·3 |
| <b>R32</b> | Unspecified urinary incontinence                                        | 1·2 |
| <b>G31</b> | Other degenerative diseases of nervous system, not elsewhere classified | 1·2 |
| <b>Y95</b> | Nosocomial condition                                                    | 1·2 |
| <b>S09</b> | Other and unspecified injuries of head                                  | 1·2 |
| <b>R45</b> | Symptoms and signs involving emotional state                            | 1·2 |
| <b>G45</b> | Transient cerebral ischaemic attacks and related syndromes              | 1·2 |
| <b>Z74</b> | Problems related to care-provider dependency                            | 1·1 |
| <b>M79</b> | Other soft tissue disorders, not elsewhere classified                   | 1·1 |
| <b>W06</b> | Fall involving bed                                                      | 1·1 |
| <b>S01</b> | Open wound of head                                                      | 1·1 |

|            |                                                                           |     |
|------------|---------------------------------------------------------------------------|-----|
| <b>A04</b> | Other bacterial intestinal infections                                     | 1·1 |
| <b>A09</b> | Diarrhoea and gastroenteritis of presumed infectious origin               | 1·1 |
| <b>J18</b> | Pneumonia, organism unspecified                                           | 1·1 |
| <b>J69</b> | Pneumonitis due to solids and liquids                                     | 1·0 |
| <b>R47</b> | Speech disturbances, not elsewhere classified                             | 1·0 |
| <b>E55</b> | Vitamin D deficiency                                                      | 1·0 |
| <b>Z93</b> | Artificial opening status                                                 | 1·0 |
| <b>R02</b> | Gangrene, not elsewhere classified                                        | 1·0 |
| <b>R63</b> | Symptoms and signs concerning food and fluid intake                       | 0·9 |
| <b>H91</b> | Other hearing loss                                                        | 0·9 |
| <b>W10</b> | Fall on and from stairs and steps                                         | 0·9 |
| <b>W01</b> | Fall on same level from slipping, tripping and stumbling                  | 0·9 |
| <b>E05</b> | Thyrotoxicosis [hyperthyroidism]                                          | 0·9 |
| <b>M41</b> | Scoliosis                                                                 | 0·9 |
| <b>R13</b> | Dysphagia                                                                 | 0·8 |
| <b>Z99</b> | Dependence on enabling machines and devices                               | 0·8 |
| <b>U80</b> | Agent resistant to penicillin and related antibiotics                     | 0·8 |
| <b>M80</b> | Osteoporosis with pathological fracture                                   | 0·8 |
| <b>K92</b> | Other diseases of digestive system                                        | 0·8 |
| <b>I63</b> | Cerebral Infarction                                                       | 0·8 |
| <b>N20</b> | Calculus of kidney and ureter                                             | 0·7 |
| <b>F10</b> | Mental and behavioural disorders due to use of alcohol                    | 0·7 |
| <b>Y84</b> | Other medical procedures as the cause of abnormal reaction of the patient | 0·7 |
| <b>R00</b> | Abnormalities of heart beat                                               | 0·7 |
| <b>J22</b> | Unspecified acute lower respiratory infection                             | 0·7 |

|            |                                                            |     |
|------------|------------------------------------------------------------|-----|
| <b>Z73</b> | Problems related to life-management difficulty             | 0·6 |
| <b>R79</b> | Other abnormal findings of blood chemistry                 | 0·6 |
| <b>Z91</b> | Personal history of risk-factors, not elsewhere classified | 0·5 |
| <b>S51</b> | Open wound of forearm                                      | 0·5 |
| <b>F32</b> | Depressive episode                                         | 0·5 |
| <b>M48</b> | Spinal stenosis (secondary code only)                      | 0·5 |
| <b>E83</b> | Disorders of mineral metabolism                            | 0·4 |
| <b>M15</b> | Polyarthrosis                                              | 0·4 |
| <b>D64</b> | Other anaemias                                             | 0·4 |
| <b>L08</b> | Other local infections of skin and subcutaneous tissue     | 0·4 |
| <b>R11</b> | Nausea and vomiting                                        | 0·3 |
| <b>K52</b> | Other noninfective gastroenteritis and colitis             | 0·3 |
| <b>R50</b> | Fever of unknown origin                                    | 0·1 |

**Appendix B: Hospital-patient One-year Mortality Risk (HOMR) scoring system.**

| Variable                               | Value                   | Points          | Variable                          | Value                      | Points |
|----------------------------------------|-------------------------|-----------------|-----------------------------------|----------------------------|--------|
| Sex                                    | Female                  | 0               | ED visits in prior year           | 0                          | 0      |
|                                        | Male                    | 1               |                                   | 1+                         | 1      |
| Home O2 prior to admission             | No                      | 0               | Admits by ambulance in prior year | 0                          | 0      |
|                                        | Yes                     | 4               |                                   | 1                          | 3      |
| Diagnostic Risk Score (see Appendix C) |                         | From Appendix C |                                   | 2                          | 4      |
| Patient admitted directly to ICU       |                         | 2               |                                   | 3+                         | 5      |
| Urgent 30-day readmission              |                         | 1               |                                   |                            |        |
| Admitting Service                      | General medicine        | 10              |                                   | General surgery            | 8      |
|                                        | Cardiology              | 8               |                                   | Cardiovascular surgery     | 9      |
|                                        | GI/Nephro/Neuro         | 9               |                                   | Neurosurgery               | 10     |
|                                        | Palliative Care         | 28              |                                   | Orthopedic/Plastic Surgery | 7      |
|                                        | Hematology/Oncology     | 14              |                                   | Thoracic / Transplant      | 7      |
|                                        | Ante-,intra-,postpartum | 0               |                                   | Trauma                     | 8      |
|                                        | Gynecology              | 7               |                                   | Urology                    | 6      |

| Variable | Level   | Points         |    |    |    |    |    |    |
|----------|---------|----------------|----|----|----|----|----|----|
|          |         | Charlson Score |    |    |    |    |    |    |
|          |         | 0              | 1  | 2  | 3  | 4  | 5  | 6  |
| Age      | 20-24.9 | 0              | 3  | 5  | 7  | 8  | 9  | 10 |
|          | 25-29.9 | 2              | 5  | 7  | 9  | 10 | 11 | 11 |
|          | 30-34.9 | 4              | 7  | 9  | 11 | 12 | 12 | 13 |
|          | 35-39.9 | 7              | 9  | 11 | 12 | 13 | 14 | 15 |
|          | 40-44.9 | 8              | 11 | 13 | 14 | 15 | 15 | 16 |
|          | 45-49.9 | 10             | 13 | 14 | 15 | 16 | 17 | 17 |
|          | 50-54.9 | 12             | 14 | 16 | 17 | 17 | 18 | 18 |
|          | 55-59.9 | 14             | 16 | 17 | 18 | 19 | 19 | 20 |
|          | 60-64.9 | 15             | 17 | 18 | 19 | 20 | 20 | 21 |
|          | 65-69.9 | 17             | 19 | 20 | 21 | 21 | 22 | 22 |
|          | 70-74.9 | 18             | 20 | 21 | 22 | 22 | 23 | 23 |
|          | 75-79.9 | 20             | 21 | 22 | 23 | 23 | 24 | 24 |
|          | 80-84.9 | 21             | 23 | 23 | 24 | 24 | 25 | 25 |
| 85-89.9  | 23      | 24             | 25 | 25 | 25 | 26 | 26 |    |
| 90-94.9  | 24      | 25             | 26 | 26 | 26 | 27 | 27 |    |
| 95+      | 25      | 26             | 27 | 27 | 27 | 28 | 28 |    |

| Variable      | Level          | Points                  |   |   |    |
|---------------|----------------|-------------------------|---|---|----|
|               |                | Admissions by ambulance |   |   |    |
|               |                | 0                       | 1 | 2 | 3+ |
| Living Status | Independent    | 0                       | 0 | 0 | 0  |
|               | Rehabilitation | 3                       | 3 | 2 | 2  |
|               | Home care      | 4                       | 3 | 3 | 3  |
|               | Nursing Home   | 4                       | 4 | 4 | 3  |

|                   |                  |   |   |   |   |
|-------------------|------------------|---|---|---|---|
|                   | Chronic Hospital | 8 | 6 | 5 | 5 |
| Admission Urgency | Elective         | 0 | 0 | 0 | 0 |
|                   | ED, no ambulance | 3 | 1 | 0 | 0 |
|                   | ED, ambulance    | 5 | 2 | 1 | 0 |

The patients HOMR score is the sum of points assigned to each covariate. Note that points for the interacting covariates age and Charlson score include the risk of patient age, Charlson score, and the interaction of these covariates. In contrast, the points for living status and admission urgency include the risk of these covariates and their interaction with admissions by ambulance in the previous year; points for the latter covariate are considered separately at the top of the table.

**APPENDIX C: Diagnostic risk score used in HOMR**

| <b>Diagnosis</b>                           | <b>Points</b> | <b>ICD10</b> | <b>ICD9</b>                   |       |       |       |       |       |       |
|--------------------------------------------|---------------|--------------|-------------------------------|-------|-------|-------|-------|-------|-------|
| Cardiac arrest                             | 12            | I46          | 427.5                         |       |       |       |       |       |       |
| Anoxic injury and other cerebral disorders | 11            | G93          | 331.8                         | 348.0 | 348.1 | 348.2 | 348.3 | 348.4 | 348.5 |
|                                            |               |              |                               |       | 348.8 | 348.9 |       |       |       |
| Brain cancer                               | 9             | C71          | 191.0                         | 191.1 | 191.2 | 191.3 | 191.4 | 191.5 | 191.6 |
|                                            |               |              |                               |       | 191.7 | 191.8 | 191.9 |       |       |
| Adult respiratory distress syndrome        | 9             | J80          | 518.8                         |       |       |       |       |       |       |
| Pancreatic cancer                          | 8             | C25          | 157.0                         | 157.1 | 157.2 | 157.3 | 157.4 | 157.8 | 157.9 |
| Shock                                      | 8             | R57          | 785.5                         |       |       |       |       |       |       |
| Esophageal cancer                          | 7             | C15          | 150.0                         | 150.1 | 150.2 | 150.3 | 150.4 | 150.5 | 150.8 |
|                                            |               |              |                               |       | 150.9 |       |       |       |       |
| Gastric cancer                             | 7             | C16          | 151.0                         | 151.3 | 151.4 | 151.2 | 151.1 | 151.5 | 151.6 |
|                                            |               |              | 151.8                         | 151.9 |       |       |       |       |       |
| Myeloid leukemias                          | 7             | C92          | 205.0 205.1 205.2 205.3       |       |       |       |       |       |       |
| Acute endocarditis                         | 7             | I33          | 421.0 421.9                   |       |       |       |       |       |       |
| Diffuse parenchymal lung disease           | 7             | J84          | 516.0                         | 516.2 | 516.1 | 516.8 | 51.5  | 516.3 | 516.4 |
|                                            |               |              | 516.9                         |       |       |       |       |       |       |
| Liver cancer                               | 6             | C22          | 155.0 155.1 155.2             |       |       |       |       |       |       |
| Intestinal lesions                         | 6             | K63          | 569.5 569.8 211.3 569.9       |       |       |       |       |       |       |
| Alcoholic liver disease                    | 6             | K70          | 571.0 571.1 571.2 571.3       |       |       |       |       |       |       |
| Bronchogenic carcinoma                     | 5             | C34          | 162.0                         | 162.2 | 162.3 | 162.4 | 162.5 | 162.8 | 162.9 |
| Non-hodgkins lymphoma                      | 5             | C85          | 202.8 200.7                   |       |       |       |       |       |       |
| Intracerebral hemorrhage                   | 5             | I61          | 431                           |       |       |       |       |       |       |
| Aspiration pneumonitis                     | 5             | J69          | 507.0 507.1 507.8             |       |       |       |       |       |       |
| Respiratory failure                        | 5             | J96          | 518.8 518.5                   |       |       |       |       |       |       |
| Biliary tract disease                      | 5             | K83          | 576.1 576.2 576.4 577.8 577.9 |       |       |       |       |       |       |
| Ascites                                    | 5             | R18          | 789.5 568.8                   |       |       |       |       |       |       |
| Septicemia                                 | 4             | A41          | 038.0                         | 038.1 | 038.3 | 038.4 | 038.8 | 038.9 |       |
| Metastatic cancer                          | 4             | C78          | 197.0                         | 197.1 | 197.2 | 197.3 | 197.4 | 197.5 | 197.6 |
|                                            |               |              |                               |       | 197.7 | 197.8 |       |       |       |
| Metastatic cancer                          | 4             | C79          | 198.0                         | 198.1 | 198.2 | 198.3 | 198.4 | 198.5 | 198.6 |
|                                            |               |              |                               |       | 198.7 | 198.8 |       |       |       |
| Hepatic failure                            | 4             | K72          | 570.0 572.2 572.4 572.8       |       |       |       |       |       |       |
| Cirrhosis                                  | 4             | K74          | 571.5 571.6 571.9             |       |       |       |       |       |       |
| Bladder cancer                             | 3             | C67          | 188.0                         | 188.1 | 188.2 | 188.3 | 188.4 | 188.5 | 188.6 |
|                                            |               |              |                               |       | 188.7 | 188.8 | 188.9 |       |       |
| Pleural effusion                           | 3             | J90          | 511.1 511.8 511.9             |       |       |       |       |       |       |
| Head injury and consequences               | 3             | S06          | 085.0                         | 851.0 | 851.1 | 852.0 | 852.1 | 853.0 | 853.1 |
|                                            |               |              |                               |       | 854.0 | 854.1 |       |       |       |
| Oncological treatment and aftercare        | 2             | Z51          | V07.1                         | V58.0 | V58.1 | V58.2 | V58.8 | V58.9 |       |
| Hip or femoral fracture                    | 1             | S72          | 820.0                         | 820.1 | 820.2 | 820.3 | 821.0 | 821.1 | 821.2 |
|                                            |               |              |                               |       | 821.3 |       |       |       |       |
| Acute myocardial infarction                | -1            | I21          | 410.0                         | 410.1 | 410.2 | 410.3 | 410.4 | 410.5 | 410.6 |
|                                            |               |              |                               |       | 410.7 | 410.8 | 410.9 |       |       |
| Unspecified dementia                       | -3            | F03          | 290.1 290.2 290.4 290.8 290.9 |       |       |       |       |       |       |
| Delirium                                   | -3            | F05          | 290.3 293.0 293.8             |       |       |       |       |       |       |
| Atrial fibrillation or flutter             | -3            | I48          | 427.3                         |       |       |       |       |       |       |



|                                       |     |     |       |       |       |       |       |       |       |
|---------------------------------------|-----|-----|-------|-------|-------|-------|-------|-------|-------|
| Chronic obstructive pulmonary disease | -3  | J44 | 491.0 | 491.1 | 491.2 | 491.8 | 491.9 | 492.8 | 496.0 |
| Lumbar or pelvic fracture             | -3  | S32 | 805.4 | 805.5 | 805.6 | 805.7 | 808.0 | 808.1 | 808.2 |
|                                       |     |     |       | 808.3 | 808.4 | 808.5 | 808.8 | 808.9 |       |
| Convalescence                         | -3  | Z54 | V66.0 | V66.1 | V66.2 | V66.3 | V66.4 | V66.5 | V66.6 |
|                                       |     |     |       |       |       | V66.9 |       |       |       |
| Breast cancer                         | -4  | C50 | 174.0 | 174.1 | 174.2 | 174.3 | 174.4 | 174.5 | 174.6 |
|                                       |     |     |       |       |       | 174.8 | 174.9 |       |       |
| Type .2 diabetes mellitus             | -4  | E11 | 250.0 | 250.1 | 250.2 | 250.3 | 250.4 | 250.5 | 250.6 |
|                                       |     |     |       |       |       | 250.7 |       |       |       |
| Cellulitis                            | -4  | L03 | 681.0 | 681.1 | 682.0 | 682.2 | 682.3 | 682.5 | 682.6 |
|                                       |     |     |       |       |       | 682.8 | 682.9 |       |       |
| Abdominal pain                        | -4  | R10 |       |       |       | 789.0 |       |       |       |
| Diarrhea, presumed infectious         | -5  | A09 |       | 009.0 | 009.1 | 009.2 | 009.3 |       |       |
| Prostate cancer                       | -5  | C61 |       |       |       | 185.0 |       |       |       |
| Conduction abnormalities              | -5  | I44 | 426.0 | 426.1 | 426.2 | 426.3 | 426.4 | 426.5 | 426.6 |
|                                       |     |     |       |       |       | 426.8 | 426.9 |       |       |
| Diverticular disease                  | -5  | K57 |       |       |       | 562.0 | 562.1 |       |       |
| Rehabilitation                        | -5  | Z50 | V57.1 | V57.2 | V57.3 | V57.4 | V57.8 | V57.9 |       |
| Tachycardia                           | -6  | I47 |       |       | 427.0 | 427.1 | 427.2 |       |       |
| Osteoarthritis of the hip             | -6  | M16 |       |       | 715.1 | 715.2 | 715.3 |       |       |
| DM.1                                  | -7  | E10 | 250.0 | 250.1 | 250.2 | 250.3 | 250.4 | 250.5 | 250.6 |
|                                       |     |     |       |       |       | 250.7 |       |       |       |
| Coronary heart disease                | -7  | I25 | 412.0 | 414.0 | 414.1 | 414.8 | 414.9 | 429.2 |       |
| Inguinal Hernia                       | -7  | K40 |       |       | 550.0 | 550.1 | 550.9 |       |       |
| Abnormalities of heart beat           | -7  | R00 |       |       | 427.8 | 785.0 | 785.1 | 785.3 |       |
| Signs of neurological/MSK system      | -7  | R29 |       | 719.6 | 781.6 | 781.7 | 781.9 | 796.1 |       |
| Lower leg fracture                    | -7  | S82 | 822.0 | 822.1 | 823.0 | 823.1 | 823.2 | 823.3 | 824.0 |
|                                       |     |     | 824.1 | 824.2 | 824.3 | 824.4 | 824.5 | 824.6 | 824.7 |
|                                       |     |     |       |       |       | 824.8 | 824.9 | 827.0 | 827.1 |
| Cholelithiasis                        | -8  | K80 |       | 574.0 | 574.1 | 574.2 | 574.3 | 574.5 |       |
| Angina                                | -9  | I20 | 411.0 | 411.1 | 411.8 | 413.0 | 413.1 | 413.9 |       |
| Intervertebral disc disorder          | -9  | M51 |       | 722.1 | 722.3 | 722.5 | 722.7 | 722.9 |       |
| Syncope                               | -9  | R55 |       |       |       | 780.2 |       |       |       |
| Spondylopathy                         | -10 | M48 | 721.0 | 721.2 | 721.3 | 721.5 | 721.6 | 721.7 | 721.8 |
|                                       |     |     |       |       | 721.9 | 723.0 | 724.0 |       |       |
| Hypertension                          | -11 | I10 |       |       | 401.0 | 401.1 | 401.9 |       |       |
| Osteoarthritis of the knee            | -11 | M17 |       |       | 715.1 | 715.2 | 715.3 |       |       |
| Acute appendicitis                    | -12 | K35 |       |       | 540.0 | 540.1 | 540.9 |       |       |
| Neck or Chest pain                    | -12 | R07 |       |       |       | 784.1 | 786.5 |       |       |
| Cerebral ischemia                     | -13 | G45 |       |       | 362.3 | 435.X | 435.0 | 436.X |       |
| Dizziness                             | -13 | R42 |       |       |       | 780.4 |       |       |       |
| Asthma                                | -15 | J45 |       |       | 493.0 | 493.1 | 493.2 | 493.9 |       |
| Vertigo                               | -16 | H81 | 386.0 | 386.1 | 386.2 | 386.3 | 386.4 | 386.5 | 386.8 |
|                                       |     |     |       |       |       | 386.9 |       |       |       |
| Female genital prolapse               | -20 | N81 | 618.0 | 618.2 | 618.3 | 618.4 | 618.6 | 618.8 | 618.9 |
| Thyroid cancer                        | -21 | C73 |       |       |       | 193.0 |       |       |       |

|                                       |     |     |                               |
|---------------------------------------|-----|-----|-------------------------------|
| Cerebral artery occlusion or stenosis | -22 | I65 | 433.2 433.0 433.1 433.8 433.9 |
|---------------------------------------|-----|-----|-------------------------------|

**Appendix D: Summary of logistic regression models**

| MODEL                               | VARIABLE                 | PARAMETER ESTIMATE | STANDARD ERROR | P-VALUE | C-STAT | LR Stat  | Adequacy |
|-------------------------------------|--------------------------|--------------------|----------------|---------|--------|----------|----------|
| <b>HOSPITALIZATION &gt; 10 DAYS</b> |                          |                    |                |         |        |          |          |
| Unadjusted                          | Intercept                | 4.4037             | 0.0447         | <0.0001 | 0.705  | 52398.1  | 0.894    |
|                                     | 1/(HFRS+1)               | -6.1945            | 0.0428         | <0.0001 |        |          |          |
|                                     | (1/(HFRS+1))*LOG(HFRS+1) | -3.1828            | 0.0387         | <0.0001 |        |          |          |
| Unadjusted                          | Intercept                | -7.9326            | 0.0899         | <0.0001 | 0.619  | 18605.1  | 0.317    |
|                                     | HOMR                     | 0.2903             | 0.00441        | <0.0001 |        |          |          |
|                                     | HOMR**2                  | -0.00274           | 0.000054       | <0.0001 |        |          |          |
| Adjusted                            | Intercept                | -0.2426            | 0.1036         | 0.0191  | 0.723  | 58619.07 | 1        |
|                                     | 1/(HFRS+1)               | -5.7095            | 0.0434         | <0.0001 |        |          |          |
|                                     | (1/(HFRS+1))*LOG(HFRS+1) | -2.9881            | 0.0391         | <0.0001 |        |          |          |
|                                     | HOMR                     | 0.1734             | 0.00451        | <0.0001 |        |          |          |
|                                     | HOMR**2                  | -0.0016            | 0.000056       | <0.0001 |        |          |          |
| <b>DEATH WITHIN 30 DAYS</b>         |                          |                    |                |         |        |          |          |
| Unadjusted                          | Intercept                | -1.8941            | 0.00824        | <0.0001 | 0.554  | 1550.12  | 0.028    |
|                                     | 1/sqrt(HFRS+1)           | -0.00007           | 3.64E-06       | <0.0001 |        |          |          |
|                                     | HFRS+1                   | 0.0231             | 0.00109        | <0.0001 |        |          |          |
| Unadjusted                          | Intercept                | -10.3298           | 0.0875         | <0.0001 | 0.772  | 54402.21 | 0.994    |
|                                     | HOMR**2                  | 0.025              | 0.000374       | <0.0001 |        |          |          |
|                                     | HOMR**2*LOG(HOMR)        | -0.00534           | 0.000087       | <0.0001 |        |          |          |
| Adjusted                            | Intercept                | -10.3788           | 0.0886         | <0.0001 | 0.773  | 54751.14 | 1        |
|                                     | 1/sqrt(HFRS+1)           | -0.00004           | 3.98E-06       | <0.0001 |        |          |          |
|                                     | HFRS+1                   | -0.022             | 0.0012         | <0.0001 |        |          |          |
|                                     | HOMR**2                  | 0.0257             | 0.000378       | <0.0001 |        |          |          |
|                                     | HOMR**2*LOG(HOMR)        | -0.00549           | 0.000088       | <0.0001 |        |          |          |
| <b>READMISSION WITHIN 30 DAYS</b>   |                          |                    |                |         |        |          |          |
| Unadjusted                          | Intercept                | -1.8261            | 0.00785        | <0.0001 | 0.524  | 384.16   | 0.193    |
|                                     | HFRS+1                   | -0.0283            | 1.84E-03       | <0.0001 |        |          |          |
|                                     | (HFRS+1)**3              | 0.00002            | 5.02E-06       | <0.0001 |        |          |          |
| Unadjusted                          | Intercept                | -3.198             | 0.0473         | <0.0001 | 0.541  | 1126.48  | 0.565    |
|                                     | HOMR**2                  | 0.00199            | 0.000091       | <0.0001 |        |          |          |
|                                     | HOMR**3                  | -0.00003           | 1.54E-06       | <0.0001 |        |          |          |

|          |             |          |          |         |      |         |   |
|----------|-------------|----------|----------|---------|------|---------|---|
| Adjusted | Intercept   | -3.2562  | 0.0474   | <0.0001 | 0.56 | 1995.47 | 1 |
|          | HFRS+1      | -0.0453  | 1.87E-03 | <0.0001 |      |         |   |
|          | (HFRS+1)**3 | 0.000037 | 4.87E-06 | <0.0001 |      |         |   |
|          | HOMR**2     | 0.0023   | 0.000091 | <0.0001 |      |         |   |
|          | HOMR**3     | -0.00003 | 1.53E-06 | <0.0001 |      |         |   |

The adequacy indicates the proportion of the log likelihood in the adjusted model that is explained by those variables. (C-stat = c-statistic; LR Stat = likelihood ratio statistic; HFRS = Hospital Frailty Risk Score; HOMR = Hospital-patient One-year Mortality Risk).

**APPENDIX E:** Competing risks model for the association of HFRS with time to readmission

Patients discharged from hospital might *not* experience a readmission because of a preceding death. In this situation, death is a competing risk for time to readmission. Censoring observation time for people who die before readmission can lead to biased parameter estimates when modelling time to readmission. To address this issue, we used Fine-Grey methods to model the time to readmission (controlling for the HFRS) while accounting for the competing risk of death. The resulting model shows that HFRS is associated with a *decreased* risk of readmission even after accounting for the competing risk of death.

| <b>Parameter</b> | <b>Estimate</b> | <b>SE</b>   | <b>Chi<sup>2</sup></b> | <b>P-value</b> | <b>HazardRatio</b> |
|------------------|-----------------|-------------|------------------------|----------------|--------------------|
| HFRS             | -0.020919235    | 0.001156561 | 327.1558               | 0.0000         | 0.979              |
